# 1 Do we need demographic data to forecast population responses to 2 climate change?

3 ANDREW T. TREDENNICK<sup>1</sup> AND PETER B. ADLER

4 *Department of Wildland Resources and the Ecology Center, 5230 Old Main Hill, Utah State*  
5 *University, Logan, Utah 84322-5230 USA*

## 6 Abstract

7 Rapid climate change has generated growing interest in forecasts of future population  
8 trajectories. Traditional population models, typically built using detailed demographic  
9 observations from one study site, can address climate change impacts at one location, but are  
10 difficult to scale up to the landscape and regional scales relevant to management decisions.  
11 An alternative is to build models using population-level data that is much easier to collect  
12 over broad spatial scales than individual-level data. However, such models ignore the fact  
13 that climate drives population growth through its influence on individual performance. Here,  
14 we test the consequences of aggregating individual responses when forecasting climate change  
15 impacts on four perennial grass species in a semi-arid grassland in Montana, USA. We  
16 parameterized two population models based on the same dataset, one based on individual-  
17 level data (survival, growth and recruitment) and one on population-level data (percent  
18 cover), and compared their accuracy, precision, and sensitivity to climate variables. The  
19 individual-level model was more accurate and precise than the aggregated model when  
20 predicting out-of-sample observations. When comparing climate effects from both models,  
21 the population-level model missed important climate effects from at least one vital rate for  
22 each species. Increasing the sample size at the population-level would not necessarily reduce  
23 forecast uncertainty; the way to reduce uncertainty is to capture unique climate dependence  
24 of individual vital rates. Our analysis indicates that there is no shortcut to forecasting climate

---

<sup>1</sup>E-mail: atredenn@gmail.com

25 change impacts on plant populations — detailed demographic data is essential. Despite the  
26 superiority of the individual-level model, the forecasts it generated still were too uncertain to  
27 be useful for decision-makers. We need new methods to collect demographic data efficiently  
28 across environmental gradients in space and time.

29 *Key words: forecasting, climate change, grassland, integral projection model, population model*

## 30 **Introduction**

31 Perhaps the greatest challenge for ecology in the 21st century is to forecast the impacts of  
32 environmental change (Clark et al. 2001, Petchey et al. 2015). Forecasts require sophisticated  
33 modeling approaches that fully account for uncertainty and variability in both ecological  
34 process and model parameters (Luo et al. 2011, but see Perretti et al. 2013 for an argument  
35 against modeling the ecological process). The increasing statistical sophistication of population  
36 models (Rees and Ellner 2009) makes them promising tools for predicting the impacts of  
37 environmental change on species persistence and abundance. But reconciling the scales at  
38 which population models are parameterized and the scales at which environmental changes  
39 play out remains a challenge (Clark et al. 2010, 2012, Freckleton et al. 2011, Queenborough  
40 et al. 2011). The problem is that most population models are built using data from a single  
41 study site because collecting those data, which involves tracking the fates of individual plants,  
42 is so difficult. The resulting models cannot be applied to the landscape and regional scales  
43 relevant to decision-making without information about how the fitted parameters respond to  
44 spatial variation in biotic and abiotic drivers (Sæther et al. 2007). The limited spatial extent  
45 of individual-level demographic datasets constrains our ability to use population models to  
46 address applied questions about the consequences of climate change.

47 The inability of most population models to address landscape-scale problems may explain  
48 why land managers and conservation planners have embraced species distribution models  
49 (SDMs) (see Guisan and Thuiller 2005 for a review). SDMs typically rely on easy-to-collect

50 presence/absence data (but see Clark et al. 2014 for new methods) and remotely-sensed  
51 environmental covariates that allow researchers to model large spatial extents (e.g., Maiorano  
52 et al. 2013). Thus, it is relatively straightforward to parameterize and project SDMs over  
53 landscapes and regions. However, the limitations of SDMs are well known (Pearson and  
54 Dawson 2003, Elith and Leathwick 2009, Araújo and Peterson 2012). Ideally, researchers  
55 would provide managers with landscape-scale population models, combining the extent of  
56 SDMs with information about dynamics and species abundances (Schurr et al. 2012, Merow  
57 et al. 2014).

58 Aggregate measures of population status, rather than individual performance, offer an  
59 intriguing alternative for modeling populations (Clark and Bjørnstad 2004, Freckleton et al.  
60 2011). Population-level data cannot provide inference about demographic mechanisms, but  
61 might be sufficient for modeling future population states, especially since such data are feasible  
62 to collect across broad spatial extents (e.g., Queenborough et al. 2011). The choice between  
63 individual and population-level data involves a difficult trade-off: while individual-level data  
64 leads to more mechanistic models, population-level data leads to models that can be applied  
65 over greater spatial and temporal extents. An open question is how much forecasting skill is  
66 lost when we build models based on population rather than individual-level data.

67 To date, most empirical population modelers have relied on individual-level data, with  
68 few attempts to capitalize on population-level measures. An important exception was an  
69 effort by Taylor and Hastings (2004) to model the population growth rate of an invasive  
70 species to identify the best strategies for invasion control. They used a “density-structured”  
71 model where the state variable is a discrete density state rather than a continuous density  
72 measure. Such models do not require individual-level demographic data and can adequately  
73 describe population dynamics. Building on Taylor and Hastings (2004), Freckleton et al.  
74 (2011) showed that density-structured models compare well to continuous models in theory,  
75 and Queenborough et al. (2011) provide empirical evidence that density-structured models  
76 are capable of reproducing population dynamics at landscape spatial scales, even if some

77 precision is lost when compared to fully continuous models. The appeal of density-structured  
78 approaches is clear. However, none of these models included environmental covariates.

79 Addressing climate change questions with models fit to population-level data is potentially  
80 problematic. It is individuals, not populations, that respond to climate variables (Clark et  
81 al. 2012). Ignoring this fact amounts to an “ecological fallacy”, where inference about the  
82 individual relies on statistical inference on the group (Piantadosi et al. 1988). Population  
83 growth (or decline) is the outcome of demographic processes such as survival, growth, and  
84 recruitment that occur at the level of individual plants. Climate can affect each demographic  
85 process in unique, potentially opposing, ways (Dalglish et al. 2011). These unique climate  
86 responses may be difficult to resolve in statistical models based on population-level data  
87 where demographic processes are not identifiable. If important climate effects are missed  
88 because of the aggregation inherent in in population-level data, then population models built  
89 with such data will make uninformative or unreliable forecasts.

90 Here, we compare the forecasting skill of statistical and population models based on ag-  
91 gregated, population-level data with models based on individual-level data. We used a  
92 unique demographic dataset that tracks the fates of individual plants from four species over  
93 14 years to build two kinds of single-species population models, traditional models using  
94 individual growth, survival, and recruitment data and alternative models based on basal  
95 cover. In both models, interannual variation is explained, in part, by climate covariates.  
96 We first quantify forecasting skill using cross-validation. We then performed simulations to  
97 quantify the sensitivities of species’ cover to small perturbations in average precipitation and  
98 temperature. Based on the cross-validation results, predictions of individual level models  
99 were clearly better, but, unfortunately, still too uncertain to inform management decisions.

## 100 **Materials and Methods**

### 101 **Study site and data**

102 Our demographic data come from the Fort Keogh Livestock and Range Research Laboratory  
103 in eastern Montana's northern mixed prairie near Miles City, Montana, USA (46° 19' N, 105°  
104 48' W). The dataset is freely available on Ecological Archives<sup>2</sup> (Anderson et al. 2011) , and  
105 interested readers should refer to the metadata for a complete description. The site is about  
106 800 m above sea level and mean annual precipitation (1878-2009) is 334 mm, with most annual  
107 precipitation falling from April through September. The community is grass-dominated and  
108 we focused on the four most abundant grass species: *Bouteloua gracilis* (BOGR), *Hesperostipa*  
109 *comata* (HECO), *Pascopyrum smithii* (PASM), and *Poa secunda* (POSE) (Fig. 1).

110 From 1932 to 1945 individual plants were identified and mapped annually in 44 1-m<sup>2</sup> quadrats  
111 using a pantograph. The quadrats were distributed in six pastures, each assigned a grazing  
112 treatment of light (1.24 ha/animal unit month), moderate (0.92 ha/aum), and heavy (0.76  
113 ha/aum) stocking rates (two pastures per treatment). In this analysis we account for potential  
114 differences among the grazing treatments, but do not focus on grazing×climate interactions.  
115 The annual maps of the quadrats were digitized and the fates of individual plants tracked  
116 and extracted using a computer program (Lauenroth and Adler 2008, Chu et al. 2014). Daily  
117 climate data are available for the duration of the data collection period (1932 - 1945) from  
118 the Miles City airport, Wiley Field, 9 km from the study site.

119 We modeled each grass population based on two levels of data: individual and quadrat (Fig.  
120 2). The individual data is the “raw” data. For the quadrat-level we data we simply sum  
121 individual basal cover for each quadrat by species. This is equivalent to a near-perfect census  
122 of quadrat percent cover because previous analysis shows that measurement error at the  
123 individual-level is small (Chu and Adler 2014). Based on these two datasets we can compare  
124 population models built using individual-level data and aggregated, quadrat-level data.

---

<sup>2</sup><http://esapubs.org/archive/ecol/E092/143/>

125 All R code and data necessary to reproduce our analysis is archived on GitHub as release  
126 v1.0<sup>3</sup> (<http://github.com/atredennick/MicroMesoForecast/releases>). That stable release will  
127 remain static as a record of this analysis, but subsequent versions may appear if we update  
128 this work. We have also deposited the v1.0 release on Dryad (*link here after acceptance*).

## 129 **Statistical models of vital rates**

130 At both levels of inference (individual and quadrat), the building blocks of our population  
131 models are vital rate regressions. For individual-level data, we fit regressions for survival,  
132 growth, and recruitment for each species. At the quadrat-level, we fit a single regression  
133 model for population growth. We describe the statistical models separately since fitting the  
134 models required different approaches. All models contain five climate covariates that we  
135 chose *a priori*: “water year” precipitation at  $t-1$  (lagppt); April through June precipitation at  
136  $t-1$  and  $t-2$  (ppt1 and ppt2, respectively) and April through June temperature at  $t-1$  and  $t-2$   
137 (TmeanSpr1 and TmeanSpr2, respectively), where  $t$  is the observation year. We also include  
138 interactions among same-year climate covariates (e.g., ppt1  $\times$  TmeansSpr1) and climate  $\times$   
139 size interactions. Climate  $\times$  size interactions are for climate main effects only; we do not  
140 include interactions between size and pairs of interacting climate effects.

141 We fit all models using a hierarchical Bayesian approach. The models are fully described in  
142 Appendix A, so here we focus on the main process and the model likelihood. For the likelihood  
143 models,  $\mathbf{y}^X$  is always the relevant vector of observations for vital rate  $X$  ( $X = S, G, R, \text{ or } P$   
144 for survival, growth, recruitment, or population growth). For example,  $\mathbf{y}^S$  is a vector of 0's  
145 and 1's indicating whether a genet survives from  $t$  to  $t+1$ , or not.

146 **Vital rate models at the individual level** We used logistic regression to model survival  
147 probability ( $S$ ) of genet  $i$  from species  $j$  in quadrat group  $Q$  from time  $t$  to  $t + 1$ :

---

<sup>3</sup>*Note to reviewers:* so that v1.0 will be associated with the published version of the manuscript, we have released v0.1 to be associated with this review version.

$$\text{logit}(S_{ijQ,t}) = \gamma_{j,t}^S + \phi_{jQ}^S + \beta_{j,t}^S x_{ij,t} + \omega_j^S w_{ij,t} + \nu_j^S w_{ij,t} x_{ij,t} + \theta_{jk}^S C_{k,t} \quad (1)$$

$$y_{ijQ,t}^S \sim \text{Bernoulli}(S_{ijQ,t}) \quad (2)$$

148 where  $x_{ij,t}$  is the log of genet size,  $\gamma_{j,t}^S$  is a year-specific intercept,  $\beta_{j,t}^S$  is the year-specific slope  
 149 parameter for size,  $\phi_{jQ}^S$  is the random effect of quadrat group location, and  $\theta_k^S$  is the fixed  
 150 parameter for the effect of the  $k$ th climate covariate at time  $t$  ( $C_{k,t}$ ). Note that the vector of  
 151 climate covariates ( $\mathbf{C}$ ) includes climate variable interactions and climate $\times$ size interactions.  
 152 We include density-dependence by estimating the effect of crowding on the focal individual  
 153 by other individuals of the same species.  $\omega$  is the effect of crowding and  $w_{t,Q}$  is the crowding  
 154 experienced by the focal individual at time  $t$  in quadrat group  $Q$ . We include a size $\times$ crowding  
 155 interaction effect ( $\nu^S$ ).

156 We modeled growth as a Gaussian process describing genet size at time  $t + 1$  as a function of  
 157 size at  $t$  and climate covariates:

$$x_{ijQ,t+1} = \gamma_{j,t}^G + \phi_{jQ}^G + \beta_{j,t}^G x_{ij,t} + \omega_j^G w_{ij,t} + \nu_j^G w_{ij,t} x_{ij,t} + \theta_{jk}^G C_{k,t} \quad (3)$$

$$y_{ijQ,t}^G \sim \text{Normal}(x_{ijQ,t+1}, \varepsilon_{ij,t}) \quad (4)$$

158 where  $x$  is log genet size and all other parameters are as described for the survival regression.  
 159 We capture non-constant error variance in growth by modeling the variance around the  
 160 growth regression ( $\varepsilon$ ) as a nonlinear function of predicted genet size:

$$\varepsilon_{ij,t} = a e^{b x_{ijQ,t+1}} \quad (5)$$

161 Our data allows us to track new recruits, but we cannot assign a specific parent to new genets.  
162 Therefore, we model recruitment at the quadrat level: the number of new individuals of  
163 species  $j$  in quadrat  $q$  recruiting at time  $t + 1$  as a function of quadrat “effective cover” ( $A'$ ) in  
164 the previous year ( $t$ ). Effective cover is a mixture of observed cover ( $A$ ) in the focal quadrat  
165 ( $q$ ) and the mean cover across the entire group ( $\bar{A}$ ) of  $Q$  quadrats in which  $q$  is located:

$$A'_{jq,t} = p_j A_{jq,t} + (1 - p_j) \bar{A}_{jQ,t} \quad (6)$$

166 where  $p$  is a mixing fraction between 0 and 1 that is estimated within the model.

167 We assume the number of individuals,  $y^R$ , recruiting at time  $t + 1$  follows a negative binomial  
168 distribution:

$$y^R_{jq,t+1} \sim \text{NegBin}(\lambda_{jq,t+1}, \zeta) \quad (7)$$

169 where  $\lambda$  is the mean intensity and  $\zeta$  is the size parameter. We define  $\lambda$  as:

$$\lambda_{jq,t+1} = A'_{jq,t} e^{(\gamma^R_{j,t} + \phi^R_{jQ} + \theta^R_{jk} C_{k,t} + \omega^R \sqrt{A'_{q,t}})} \quad (8)$$

170 where  $A'$  is effective cover ( $\text{cm}^2$ ) of species  $j$  in quadrat  $q$  and all other terms are as in the  
171 survival and growth regressions.

172 **Population model at the quadrat level** The statistical approach used to model aggre-  
173 gated data depends on the type of data collected. We have percent cover data, which can  
174 easily be transformed to proportion data. We first considered fitting three vital rate models  
175 analagous to those we fit at the individual level: one for probability of extirpation within a  
176 quadrat (analagous to survival), one for cover change within a quadrat (analagous to growth),  
177 and one for probability of colonization within a quadrat (analagous to recruitment). However,



178 within-quadrat extirpation and colonization events were rare in our time series ( $N = 9$  and  
179  $N = 10$ , respectively, across all species). Given the broad spatial distribution of the quadrats  
180 we are studying, it is safe to assume that these events are in fact rare enough to be ignored  
181 for our purposes. So we constrained our statistical modeling of vital rates at the population  
182 level to change in percent cover within quadrats. For the remaining discussion of statistical  
183 modeling, we refer to proportion data, which is simply percent cover divided by 100.

184 An obvious choice for fitting a linear model to proportion data is beta regression because the  
185 support of the beta distribution is  $[0,1]$ , not including true zeros or ones. However, when we  
186 used fitted model parameters from a beta regression in a quadrat-based population model,  
187 the simulated population tended toward 100% cover for all species. We therefore chose a  
188 more constrained modeling approach based on a truncated log-normal likelihood. The model  
189 for quadrat cover change from time  $t$  to  $t + 1$  is

$$x_{jq,t+1} = \gamma_{j,t}^P + \phi_{jQ}^P + \beta_{j,t}^P x_{jq,t} + \theta_{jk}^P C_{k,t} \quad (9)$$

$$y_{jq,t+1}^P \sim \text{LogNormal}(x_{jq,t+1}, \tau_j) \text{T}[0, 1] \quad (10)$$

190 where  $x_{jq,t}$  is the log of species'  $j$  proportional cover in quadrat  $q$  at time  $t$  and all other  
191 parameters are as in the individual-level growth model (Eq. 3). Again, note that the climate  
192 covariate vector ( $\mathbf{C}$ ) includes the climate $\times$ cover interaction. The log normal likelihood  
193 includes a truncation ( $\text{T}[0,1]$ ) to ensure that predicted values do not exceed 100% cover.

## 194 **Model fitting**

195 Our Bayesian approach to fitting the vital rate models required choosing appropriate priors  
196 for unknown parameters and deciding which, if any, of those priors should be hierarchical.  
197 We decided to fit models where all terms were fit by species. Within a species, we fit yearly

198 size effects and yearly intercepts hierarchically where year-specific coefficients were drawn  
199 from global distributions representing the mean size effect and intercept. Quadratic random  
200 effects were also fit hierarchically, with quadratic offsets being drawn from distributions with  
201 mean zero and a shared variance term (independent Gaussian priors, Appendix A). Climate  
202 effects were not modeled hierarchically, and each was given a diffuse prior distribution. We  
203 used standard diffuse priors for all unknown parameters (Appendix A).

204 All of our analyses (model fitting and simulating) were conducted in R (R Core Development  
205 Team 2013). We used the ‘No-U-Turn’ MCMC sampler in Stan (Stan Development Team  
206 2014a) to estimate the posterior distributions of model parameters using the package ‘rstan’  
207 (Stan Development Team 2014b). We obtained posterior distributions for all model parameters  
208 from three parallel MCMC chains run for 1,000 iterations after discarding an initial 1,000  
209 iterations. Such short MCMC chains may surprise readers more familiar with other MCMC  
210 samplers (i.e. JAGS or WinBUGS), but the Stan sampler is exceptionally efficient, which  
211 reduces the number of iterations needed to achieve convergence. We assessed convergence  
212 visually and made sure scale reduction factors for all parameters were less than 1.01. For the  
213 purposes of including parameter uncertainty in our population models, we saved the final  
214 1,000 iterations from each of the three MCMC chains to be used as randomly drawn values  
215 during population simulation. This step alleviates the need to reduce model parameters by  
216 model selection since sampling from the full parameter space in the MCMC ensures that if a  
217 parameter broadly overlaps zero, on average the effect in the population models will also be  
218 near zero. We report the posterior mean, standard deviation, and 95% Bayesian Credible  
219 Intervals for every parameter of each model for each species in Appendix B.

## 220 **Population models**

221 With the posterior distribution of the vital rate statistical models in hand, it is straightforward  
222 to simulate the population models. We used an Integral Projection Model (IPM) to model

223 populations based on individual-level data (Ellner and Rees 2006) and a quadrat-based  
224 version of an individually-based model (Quadrat-Based Model, QBM) to model populations  
225 based on quadrat-level data. We describe each in turn.

226 **Integral projection model** We use a stochastic IPM (Rees and Ellner 2009) that includes  
227 the climate covariates from the vital rate statistical models. In all simulations we ignore  
228 the random year effects so that interannual variation is driven solely by climate. We fit the  
229 random year effects in the vital rate regressions to avoid over-attributing variation to climate  
230 covariates. Our IPM follows the specification of Chu and Adler (2015) where the population  
231 of species  $j$  is a density function  $n(u_j, t)$  giving the density of sized- $u$  genets at time  $t$ . Genet  
232 size is on the natural log scale, so that  $n(u_j, t)du$  is the number of genets whose area (on the  
233 arithmetic scale) is between  $e^{u_j}$  and  $e^{u_j+du}$ . The density function for any size  $v$  at time  $t + 1$   
234 is

$$n(v_j, t + 1) = \int_{L_j}^{U_j} k_j(v_j, u_j, \bar{w}_j(u_j))n(u_j, t) \quad (11)$$

235 where  $k_j(v_j, u_j, \bar{w}_j)$  is the population kernel that describes all possible transitions from size  $u$   
236 to  $v$  and  $\bar{w}_j$  is a scalar representing the average intraspecific crowding experienced by a genet  
237 of size  $u_j$  and species  $j$ . The integral is evaluated over all possible sizes between predefined  
238 lower ( $L$ ) and upper ( $U$ ) size limits that extend beyond the range of observed genet sizes.

239 Since the IPM is spatially-implicit, we cannot calculate neighborhood crowding for specific  
240 genets ( $w_{ij}$ ). Instead, we use an approximation ( $\bar{w}_j$ ) that captures the essential features of  
241 neighborhood interactions (Adler et al. 2010). This approximation relies on a ‘no-overlap’  
242 rule for conspecific genets to approximate the overdispersion of large genets in space (Adler  
243 et al. 2010).

244 The population kernel is defined as the joint contributions of survival ( $S$ ), growth ( $G$ ), and  
245 recruitment ( $R$ ):

$$k_j(v_j, u_j, \bar{w}_j) = S_j(u_j, \bar{w}_j(u_j))G_j(v_j, u_j, \bar{w}_j(u_j)) + R_j(v_j, u_j, \bar{w}_j), \quad (12)$$

246 which means we are calculating growth ( $G$ ) for individuals that survive ( $S$ ) from time  $t$  to  $t+1$   
247 and adding in newly recruited ( $R$ ) individuals of an average sized one-year-old genet for the  
248 focal species. Our statistical model for recruitment ( $R$ , described above) returns the number of  
249 new recruit produced per quadrat. Following previous work (Adler et al. 2012, Chu and Adler  
250 2015), we assume that fecundity increases linearly with size ( $R_j(v_j, u_j, \bar{w}_j) = e^{u_j} R_j(v_j, \bar{w}_j)$ )  
251 to incorporate the recruitment function in the spatially-implicit IPM.

252 We used random draws from the final 1,000 iterations from each of three MCMC chains to  
253 introduce stochasticity into our population models. At each time step, we randomly selected  
254 climate covariates from one of the 14 observed years. Then, we drew the full parameter  
255 set (climate effects and density-dependence fixed effects) from a randomly selected MCMC  
256 iteration. Using this approach, rather than simply using coefficient point estimates, captures  
257 the effect of parameter uncertainty. Relatively unimportant climate covariates (those that  
258 broadly overlap 0) will have little effect on the mean of the simulation results, but can  
259 contribute to their variation. Since our focus was on the contribution of climate covariates to  
260 population states, we set the random year effects and the random group effects to zero.

261 **Quad-based model** To simulate our quad-based model (QBM), we simply iterate the  
262 quadrat-level statistical model (Eqs. 9-10). We use the same approach for drawing parameter  
263 values as described for the IPM. After drawing the appropriate parameter set, we calculate  
264 the mean response (population cover at  $t+1 = x_{t+1}$ ) according to Eq. 9. We then make a  
265 random draw from a  $[0,1]$  truncated lognormal distribution with mean equal to  $x_{t+1}$  from Eq.  
266 9 and the variance estimate from the fitted model. We can then project the model forward by  
267 drawing a new parameter set (unique to climate year and MCMC iteration) at each timestep.  
268 As with the IPM, random year effects are ignored for all simulations.

## 269 **Model validation**

270 To test each model's ability to forecast population state, we made out-of-sample predictions  
271 using leave-one-year-out cross validation. For both levels of modeling, we fit the vital rate  
272 models using observations from all years except one, and then used those fitted parameters in  
273 the population models to perform a one-step-ahead forecast for the year whose observations  
274 were withheld from model fitting. Within each observation year, several quadrats were  
275 sampled. We made predictions for each observed quadrat in the focal year, initializing each  
276 simulation with cover in the quadrat the previous year. Since we were making quadrat-specific  
277 predictions, we incorporated the group random effect on the intercept for both models. We  
278 repeated this procedure for all 13 observation years, making 100 one-step-ahead forecasts for  
279 each quadrat-year combination with parameter uncertainty included via random draw from  
280 the MCMC chain as described above. Random year effects were set to zero since year effects  
281 cannot be assigned to unobserved years.

282 This cross-validation procedure allowed us to compare accuracy and precision of the two  
283 modeling approaches (IPM versus QBM). We first calculated the median predicted cover  
284 across the 100 simulations for each quadrat-year and then calculated the absolute error as the  
285 absolute value of the difference between the observed cover for a given quadrat-year and the  
286 median prediction. To arrive at mean absolute error (MAE), we then averaged the absolute  
287 error within each species across the quadrat-year specific errors. We use MAE as our measure  
288 of accuracy. To measure precision we calculated the distance between the upper and lower  
289 90th quantiles of the 100 predictions and averaged this value over quadrat-years for each  
290 species.

## 291 **Testing sensitivity to climate covariates**

292 With our fitted and validated models in hand, we ran simulations for each model type (IPM  
293 and QBM) under four climate perturbation scenarios: (1) observed climate, (2) precipitation

294 increased by 1%, (3) temperature increased by 1%, and (4) precipitation and temperature  
295 increased by 1%. We ran the simulations for 2,500 time steps, enough to estimate equilibrium  
296 cover after discarding an initial 500 time steps as burn-in. Each simulation was run under  
297 two parameter scenarios: (1) using mean parameter estimates and (2) using randomly drawn  
298 parameters from the MCMC chain. We use (1) to detect the overall sensitivity of equilibrium  
299 cover to climate, and we use (2) to show the impact of model and parameter uncertainty on  
300 forecast precision.

301 As an effort to identify potential discrepancies between IPM and QBM forecasts, we also  
302 ran simulations designed to quantify the sensitivities of individual and combined vital rates  
303 to climate for the IPM. Specifically, we ran simulations for the above climate scenarios,  
304 but applied the perturbed climate covariates to survival, growth, or recruitment vital rates  
305 individually and in pairwise combinations. This allowed us to isolate the vital rate(s) most  
306 sensitive to climate. For this analysis, we used mean parameter estimates to reduce the  
307 sources of uncertainty in the sensitivity estimates.

308 We expected the IPM to produce more accurate and precise forecasts due to either (1) the  
309 smaller sample size of the quadrat level data sets compared to the individual level data sets,  
310 leading to larger parameter uncertainty for the QBM, or (2) the QBM climate effects being  
311 weakly associated with one or more vital rate climate effects at the individual level. To assess  
312 the impact of sample size on QBM parameter uncertainty we refit the QBM statistical model  
313 (Eqs. 9-10) after removing sets of 2, 5, 10, and 15 quadrats. We fit 10 models at each level  
314 of quadrat removal (2, 5, 10, 15 quadrats), removing a different randomly selected set of  
315 quadrats for each fit. We calculated the standard deviation of climate main effects (pptLag,  
316 ppt1, ppt2, TmeanSpr1, and TmeanSpr2) for each model and averaged those over replicates  
317 within each set of quadrat removals. This allowed us to regress parameter uncertainty against  
318 sample size.

319 To determine if the QBM climate effects are correlated with climate effects for each vital

320 rate model in the IPM, we simply regressed the QBM climate coefficients against each vital  
321 rate model's climate coefficients and calculated Pearson's  $\rho$ . Strong correlations indicate the  
322 QBM is capable of detecting climate effects associated with individual vital rates. A weak  
323 correlation indicates the QBM "misses" the climate effect on a particular vital rate.

## 324 **Results**

### 325 **Comparison of forecast models**

326 The IPM had lower overall error (MAE, mean absolute error) compared to the QBM for three  
327 species (Table 1). The IPM MAE is significantly lower at  $\alpha = 0.05$  for *B. gracilis* ( $P = 0.0012$ ),  
328 *H. comata* ( $P = 4.0586 \times 10^{-8}$ ), and *P. smithii* ( $P = 3.183 \times 10^{-5}$ ). MAEs are statistically  
329 similar between models for *P. secunda* ( $P = 0.0922$ ).  $P$  values are highly sensitive to sample  
330 size, so not entirely appropriate in simulation exercises where we control the samples size.  
331 But, for our purposes they serve as relatively unbiased comparison metrics. In no case did the  
332 QBM significantly outperform the IPM (Table 1). The IPM was consistently more precise  
333 than the QBM, with lower distances between the 90% quantiles across all species (Table 1).  
334 In general the IPM outperformed the QBM because it had (1) lower MAE for three of the  
335 four species, (2) statistically similar MAE for the one other species, and (3) considerably  
336 more precise forecasts for all species.

### 337 **Sensitivity of models to climate**

338 The response of a population to climate change is a result of the aggregate effects of climate  
339 on individual vital rates. Since the IPM approach relies on vital rate regressions, we were  
340 able to quantify the sensitivity of each vital rate in isolation and in pairwise combinations.  
341 Across all species, climate covariates can have opposing effects on different vital rates (Fig.  
342 3). Growth was the most sensitive vital rate for all species, showing a negative response

343 to increased precipitation, and stronger positive response to increased temperature, and a  
344 mostly positive response when both climate factors are increased (Fig. 3). *B. gracilis* survival  
345 rates were sensitive to temperature, resulting in an increase in plant cover under increased  
346 temperature (Fig. 3a). In isolation, recruitment and survival were insensitive to climate  
347 factors for *H. comata* (Fig. 3b). Survival and recruitment of *P. smithii* were both sensitive,  
348 negatively, to temperature and precipitation (Fig. 3c). *P. secunda* equilibrium cover was  
349 sensitive to the climate effects on survival and recruitment, showing a negative effect on both  
350 vital rates for increased precipitation, but a strong positive effect on survival with increased  
351 temperature (Fig. 3d). Equilibrium cover responded negatively when increased precipitation  
352 and temperature affect recruitment (Fig. 3d). At least two of three vital rates were sensitive  
353 to climate for each species (Fig. 3).

#### 354 Sources of uncertainty in the QBM

355 Sample size had a relatively weak effect on QBM climate parameter uncertainty after the  
356 number of quadrats used in fitting exceeded about 10 (Fig. 5). Inverse-gaussian fits show that  
357 increasing sample size beyond the number of quadrats we used would result in diminishing  
358 returns in terms of parameter certainty (Fig. 5).

359 Climate effects estimated from the QBM are most correlated with climate effects from the  
360 growth regression at the individual level (Fig. 6). In no case does the QBM statistical  
361 model have strong correlations across all three vital rates (Fig. 6). QBM climate effects were  
362 most weakly correlated with those from individual-level recruitment models for *B. gracilis*,  
363 *H. comata*, and *P. secunda* (Fig. 6a,b,d). For *P. smithii*, QBM climate effects showed no  
364 correlation with the survival model effects (Fig. 6c).



## 365 **Model forecasts**

366 Forecasts based on 1% climate changes were extremely uncertain when we considered model  
367 error and parameter uncertainty (Fig. 6; simulations with mean parameters are in Appendix  
368 D for comparison). As expected based on model validation (Table 1), QBM projections were  
369 more uncertain than IPM projections for all species except *P. smithii* (Fig. 6). IPM forecasts  
370 for *P. smithii* were very uncertain due to a very high intrinsic rate of recruitment combined  
371 with uncertainty in climate coefficients which lead to high recruitment boom years and  
372 subsequent busts when young plants suffer high mortality (Appendx C). When we included  
373 model error and parameter uncertainty, forecast changes in proportional cover always spanned  
374 a wide range of negative to positive values. In other words, neither model could predict  
375 whether a climate perturbation would increase or decrease equilibrium population size.

## 376 **Discussion**

377 Population models built using individual-level data allow inference on demographic processes,  
378 but they can only forecast future population states across the (typically limited) spatial  
379 extent of the observations. Population-level data are much easier to collect across broad  
380 spatial extents, so models built using such data offer an appealing alternative to traditional  
381 population models (Queenborough et al. 2011). However, density-structured models rely  
382 on the aggregation of individual-level data. This creates a potential problem if such models  
383 are to be used in a climate change context because it is individuals, not populations, which  
384 respond to climate (Clark et al. 2012). Are models based on population-level metrics as  
385 sensitive to climate as models based on individual-level metrics? Do these two types of models  
386 produce consistent forecasts? Do we need detailed demographic data to forecast the impacts  
387 of climate change?

## 388 **The importance of demographic data**

389 Our comparison of a traditional, demographic population model (the IPM) with a model  
390 inspired by density-structured models (the QBM) showed that the IPM outperformed the  
391 QBM: the IPM was more accurate and precise than the QBM in out-of-sample cross validation  
392 (Table 1). The superiority of the IPM could reflect either differences in sample size or the  
393 effect of averaging over unique effects of climate on each individual-level vital rate. Although  
394 increasing sample size of quadrat percent-cover observations would be easy to do in the field,  
395 we found little evidence that it would lead to higher precision of climate coefficient estimates  
396 (Fig. 4).

397 We did, however, find evidence that the QBM statistical model failed to identify climate  
398 dependence for some vital rates (Fig. 5). For no species were climate effects from the  
399 QBM strongly correlated with all three vital rates (Fig. 5). Freckleton et al. (2011)  
400 acknowledge that averaging over complex stage dependence will lead to poorly specified  
401 models. This is analogous to our situation, but instead of averaging over complex life histories,  
402 we are averaging over complex climate dependence. Though our work here focused on plant  
403 species, this finding is applicable to any species with vital rates that respond uniquely to  
404 weather/climate.

405 Our interpretation is that the QBM is “missing” climate signals associated with at least one  
406 vital rate for each species. This leads to inaccurate and imprecise forecasts because the QBM  
407 statistical model struggles to explain variation due to climate variables that have positive and  
408 negative impacts on different vital rates. When this is the case, as it is for all our species to  
409 varying degrees (Fig. 3), forecasts from models based on population-level data will fail. Our  
410 result is consistent with related work on the importance of individual-level data to forecast  
411 population responses to exogenous drivers (Clark et al. 2011a, 2011b, 2012, Galván et al.  
412 2014).

413 Detailed demographic data appears to be necessary to forecast climate change impacts

414 on plant populations when vital rates have unique climate responses. How then can we  
415 build models to make forecasts for the landscape and regional scales beyond the scope  
416 of traditional population models (Queenborough et al. 2011)? There are alternatives to  
417 density-structured models. For example, Clark et al. (2011a) use Forest Inventory and  
418 Analysis (FIA) data to parameterize a population model with multiple vital rates and climate  
419 dependence. Distributed efforts such as PlantPopNet (<http://plantago.plantpopnet.com>) will  
420 allow researchers to estimate variation around climate responses for widespread species by  
421 taking advantage of spatial variation in climate (e.g. Doak and Morris 2010). Finally, new  
422 approaches on the horizon that leverage photo/video of plots and advanced object recognition  
423 algorithms (e.g. Liu et al. 2014) will increase the efficiency of plant mapping and digitizing  
424 efforts.

#### 425 **The challenge of uncertainty**

426 An important, but unexpected, result of our analysis was the great uncertainty in forecasts,  
427 even for our best model. The typical approach in ecology is to use point estimates of model  
428 parameters to project populations forward according to the specified model, usually allowing  
429 for some variability around the deterministic process (e.g. Battin et al. 2007, Jenouvrier et al.  
430 2009, Adler et al. 2012). If we follow tradition and calculate the mean response to climate  
431 perturbation with only model error and interannual variation included, the IPM and the  
432 QBM produce opposing forecasts for three of four species (Fig. D1). It would be tempting  
433 to interpret this inconsistency as further evidence for the superiority of the IPM. However,  
434 if we introduce parameter uncertainty, the forecasts are actually indistinguishable (Fig. 6),  
435 though the IPM projections are generally more precise (consistent with our cross-validation  
436 results). The real story is that both models produce highly uncertain forecasts. For all species,  
437 the 90% quantiles of predicted changes in population size overlapped zero; we cannot even  
438 predict whether a change in precipitation or temperature will cause populations to increase  
439 or decrease. This result held when we tried perturbing climate by 10% and 20% as well.

440 Our results highlight the state of affairs in ecology when it comes to forecasting the impacts  
441 of climate change. The analysis we conducted here could be considered at the forefront  
442 of ecological forecasting with respect to the statistical approach employed (hierarchical  
443 Bayesian), the type of population model we used (density-dependent, stochastic IPM with  
444 parameter uncertainty), and the amount of high quality data we had at our disposal (14  
445 years of individual-level data). Yet, model predictions proved so uncertain that any forecast,  
446 when bounded with model and parameter uncertainty, would be uninformative.

447 How might we improve on this state of affairs? First, forecasts could be improved by matching  
448 the spatial scale of predictor variables with the spatial scale of observations. One of the major  
449 limitations of the models we fit here is that the climate data are collected at a larger scale  
450 than the individual-level observations of plant size. Climate covariates only vary by year,  
451 with no spatial variability within years. Thus, even if we fit models to individual-level data,  
452 we are missing the key interaction point between weather and individual plants (Clark et  
453 al. 2011b) because all observations share the same climate covariates. Demographic studies  
454 should be designed with at least plot-level measurements of climate related variables (e.g.,  
455 soil moisture). Second, accurately detecting climate signals will take even longer time series.  
456 Recent theoretical work on detecting climate signals in noisy data suggests that even advanced  
457 approaches to parameter fitting require 20-25 year time series (Teller et al. n.d.). Third,  
458 ecologists need a stronger commitment to reporting uncertainty. Although most modeling  
459 studies explicitly consider model uncertainty, parameter uncertainty is often ignored. In some  
460 cases this is because the most convenient statistical methods make it difficult to propagate  
461 parameter uncertainty. Yet even Bayesian approaches that allow integration of model fitting  
462 and forecasting (Hobbs and Hooten 2015) are not simple when using modeling approaches  
463 like integral projection models that separate the model fitting and simulation stages (Rees  
464 and Ellner 2009). However, as we have done here, it is still possible to include parameter  
465 uncertainty by drawing parameter values from MCMC iterations, taking care to draw all  
466 parameters from the same chain and iteration to account for their correlations. Only by

467 being honest about our forecasts can we begin to produce better ones, and forecasts reported  
468 without parameter error are disingenuous. Ignoring parameter error may be justifiable when  
469 the goal is investigating basic processes, but it is indefensible when forecasting is the goal.

## 470 **Conclusions**

471 This work is not a critique of density-structured population models. We are confident that  
472 density-structured models will prove to be a valuable tool for many applications. However,  
473 our analysis represents the first comparison, to our knowledge, of population models based on  
474 individual and aggregated forms of the same data in a climate change context. Our results  
475 confirm theoretical arguments (Clark et al. 2011b) and empirical evidence (Clark et al. 2011a,  
476 2012) that individual responses are critical for predicting species' responses to climate change.  
477 It seems there is no short cut to producing accurate and precise population forecasts: we  
478 need detailed demographic data to forecast the impacts of climate change on populations.  
479 Given the importance of demographic data and its current collection cost, we need modern  
480 methods to collect demographic data more efficiently across environmental gradients in space  
481 and time.

482 Our results also offer a cautionary tale because forecast uncertainty was large for both  
483 model types. Even with 14 years of detailed demographic data and sophisticated modeling  
484 techniques, our projections contained too much uncertainty to be informative. Uncertainty  
485 in demographic responses to climate can be reduced by collecting (1) longer time series and  
486 (2) climate covariates that match the scale of inference (e.g., plot rather than landscape level  
487 climate/weather metrics).

## 488 **Acknowledgments**

489 This work was funded by the National Science Foundation through a Postdoctoral Research  
490 Fellowship in Biology to ATT (DBI-1400370) and a CAREER award to PBA (DEB-1054040).

491 We thank the original mappers of the permanent quadrats in Montana and the digitizers in  
492 the Adler lab, without whom this work would not have been possible. Informal conversations  
493 with Stephen Ellner, Giles Hooker, Robin Snyder, and a series of meetings between the Adler  
494 and Weecology labs at USU sharpened our thinking. Brittany Teller provided comments  
495 that improved our manuscript. Compute, storage and other resources from the Division of  
496 Research Computing in the Office of Research and Graduate Studies at Utah State University  
497 are gratefully acknowledged.

## 498 Tables

Table 1: Accuracy (mean absolute error, MAE) and precision (90% Distance) of out of sample predictions. Forecasts were made without random year effects; only climate covariates could explain year-to-year variation. 90% Distance refers to the average distance between the upper and lower 90th percentiles of the 100 predicted values for each quadrat-year combination.

| Species | Model | MAE   | 90% Distance | Mean Obs. Cover |
|---------|-------|-------|--------------|-----------------|
| BOGR    | IPM   | 12.18 | 38.52        | 9.43            |
| BOGR    | QBM   | 19.66 | 56.50        | 9.26            |
| HECO    | IPM   | 1.22  | 6.47         | 1.15            |
| HECO    | QBM   | 12.35 | 41.11        | 1.18            |
| PASM    | IPM   | 0.19  | 1.65         | 0.42            |
| PASM    | QBM   | 0.55  | 7.78         | 0.42            |
| POSE    | IPM   | 1.37  | 7.64         | 1.25            |
| POSE    | QBM   | 1.79  | 40.59        | 1.27            |

499 **Figures**

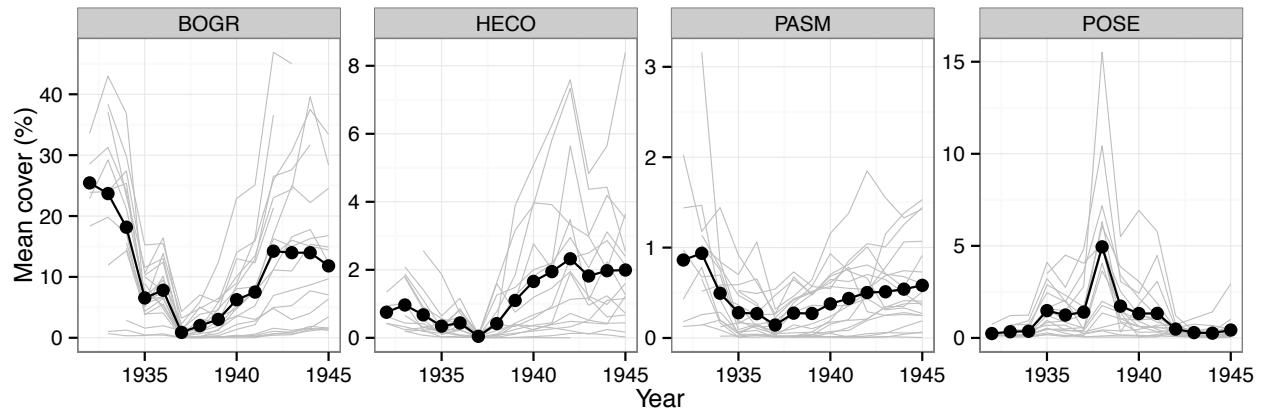

Figure 1: Time series of average percent cover over all quadrats for our four focal species: *Bouteloua gracilis* (BOGR), *Hesperostipa comata* (HECO), *Pascopyrum smithii* (PASM), and *Poa secunda* (POSE). Light grey lines show trajectories of individual quadrats. Note the different y-axis scales across panels.



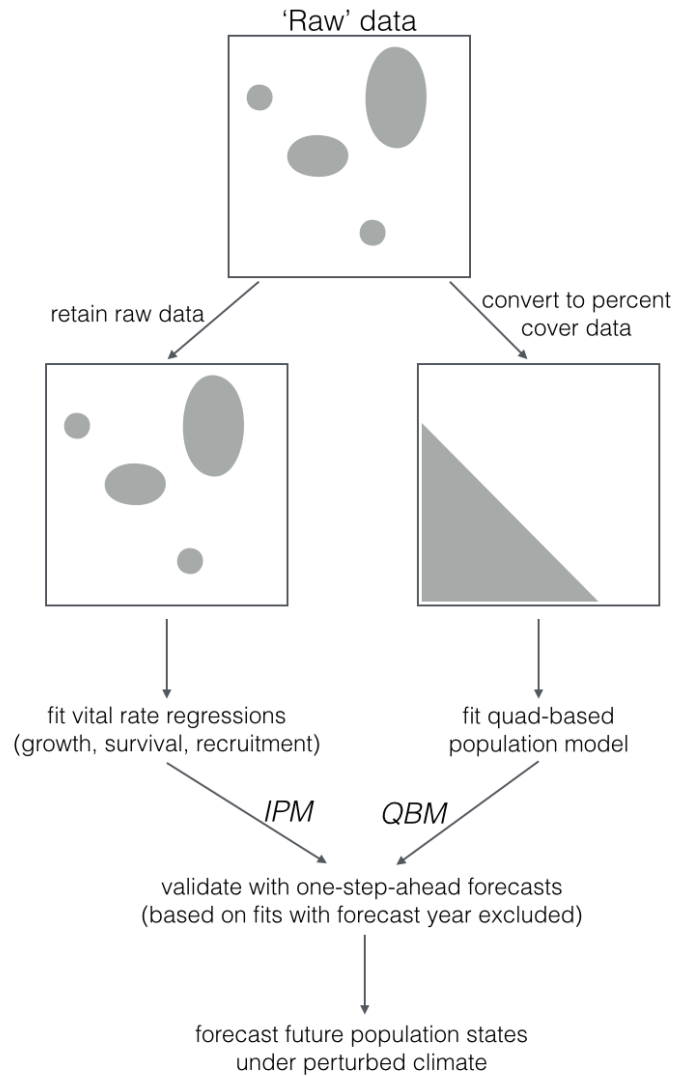

Figure 2: Work flow of the data aggregation, model fitting, and population simulating.

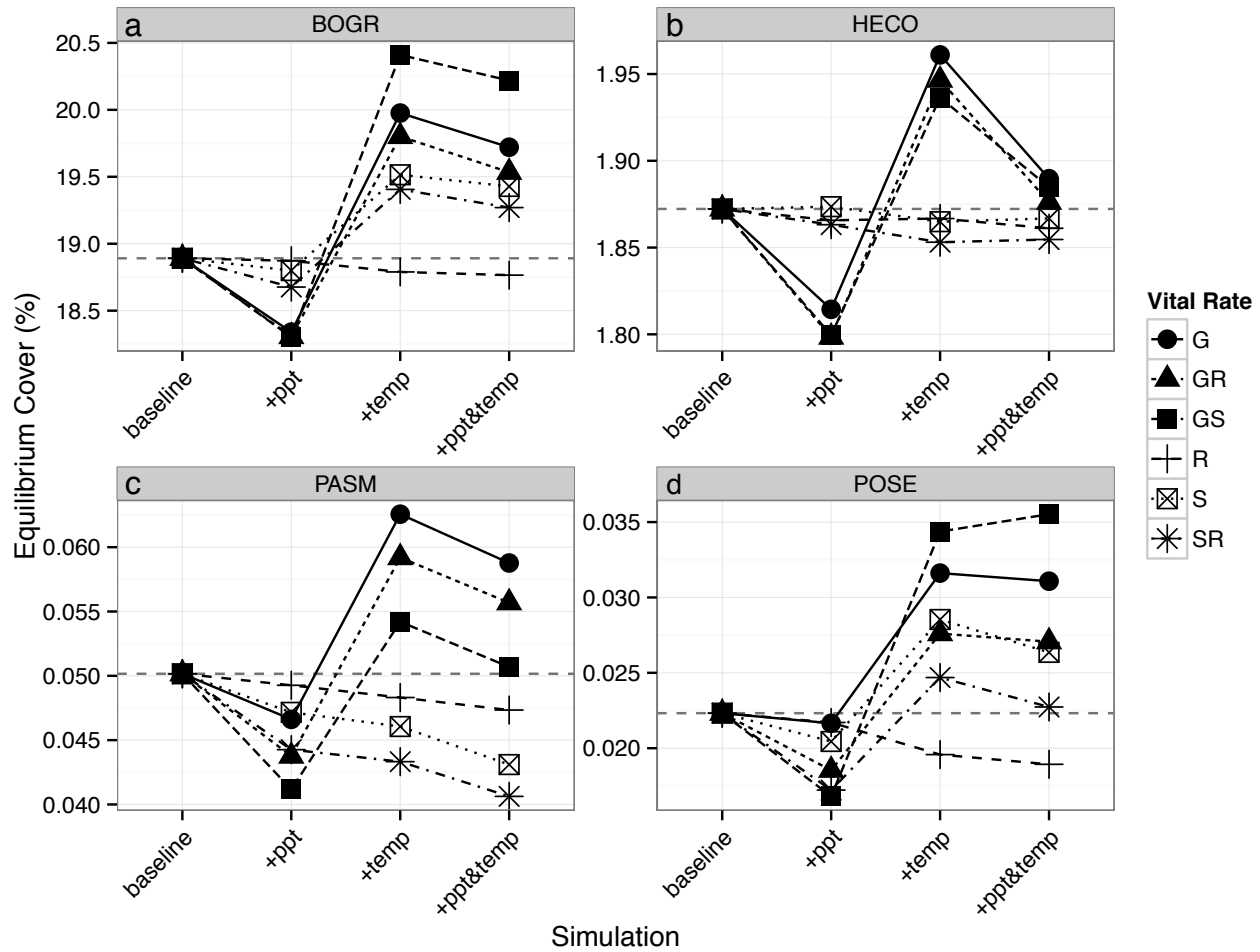

Figure 3: Sensitivity of equilibrium cover simulated from the IPM to each climate scenario applied to individual and combined vital rates. For example, the points associated with G show the median cover from IPM simulations where a climate perturbation is applied only to the growth regression climate covariates. These simulations use mean parameter values for clarity.

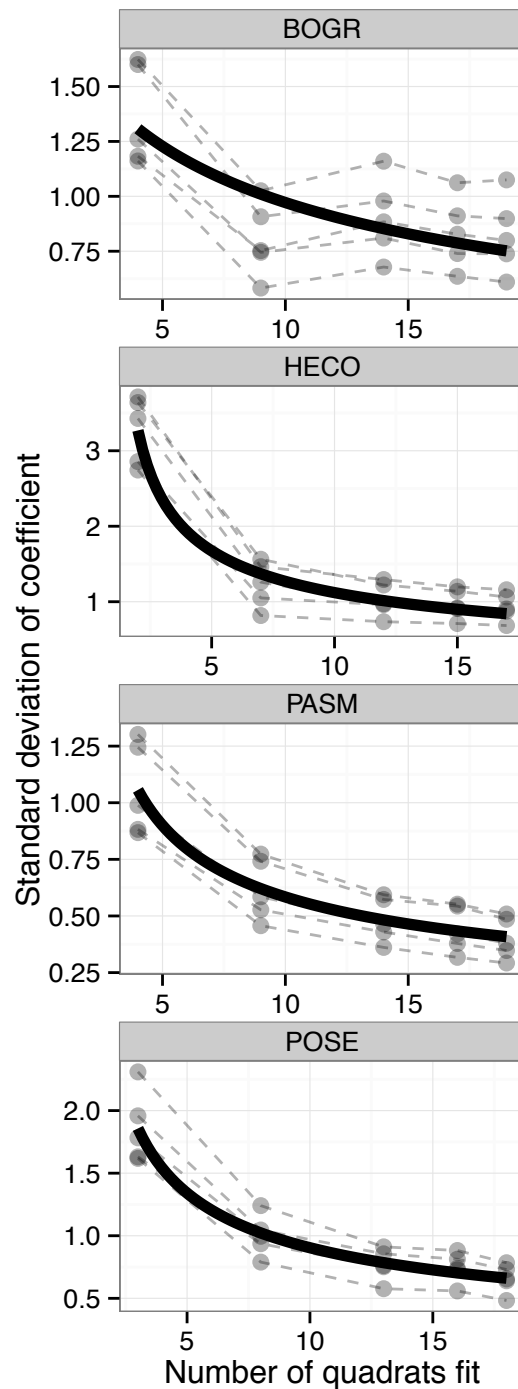

Figure 4: Effect of quadrat sample size on the precision (standard deviation) of main climate effect estimates in the QBM. Increasing the number of quadrats results in diminishing returns in terms of parameter certainty. Light dashed lines show individual climate effects at five quadrat sample sizes. Thick dark lines are inverse gaussian fits showing the mean effect of increasing quadrat sample size on parameter precision.

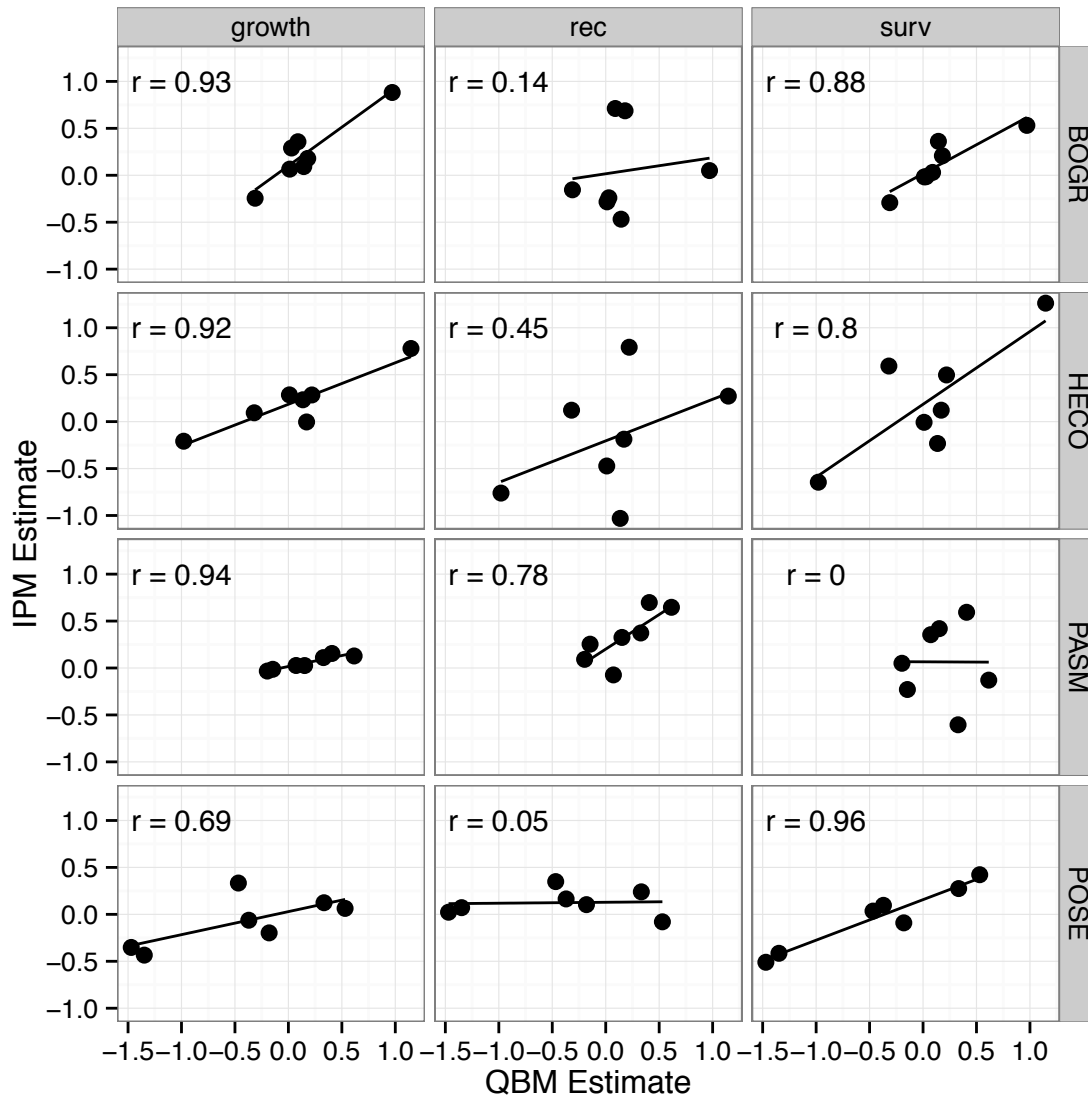

Figure 5: Correlations ( $r$ ) between QBM and IPM estimates of climate effects. We ignore sizeXclimate interactions since these are not directly comparable across model types. The QBM does not have multiple vital rates, so its values are repeated across panels within each species. Across top panels, ‘growth’ = growth regression, ‘rec’ = recruitment regression, ‘surv’ = survival regression.

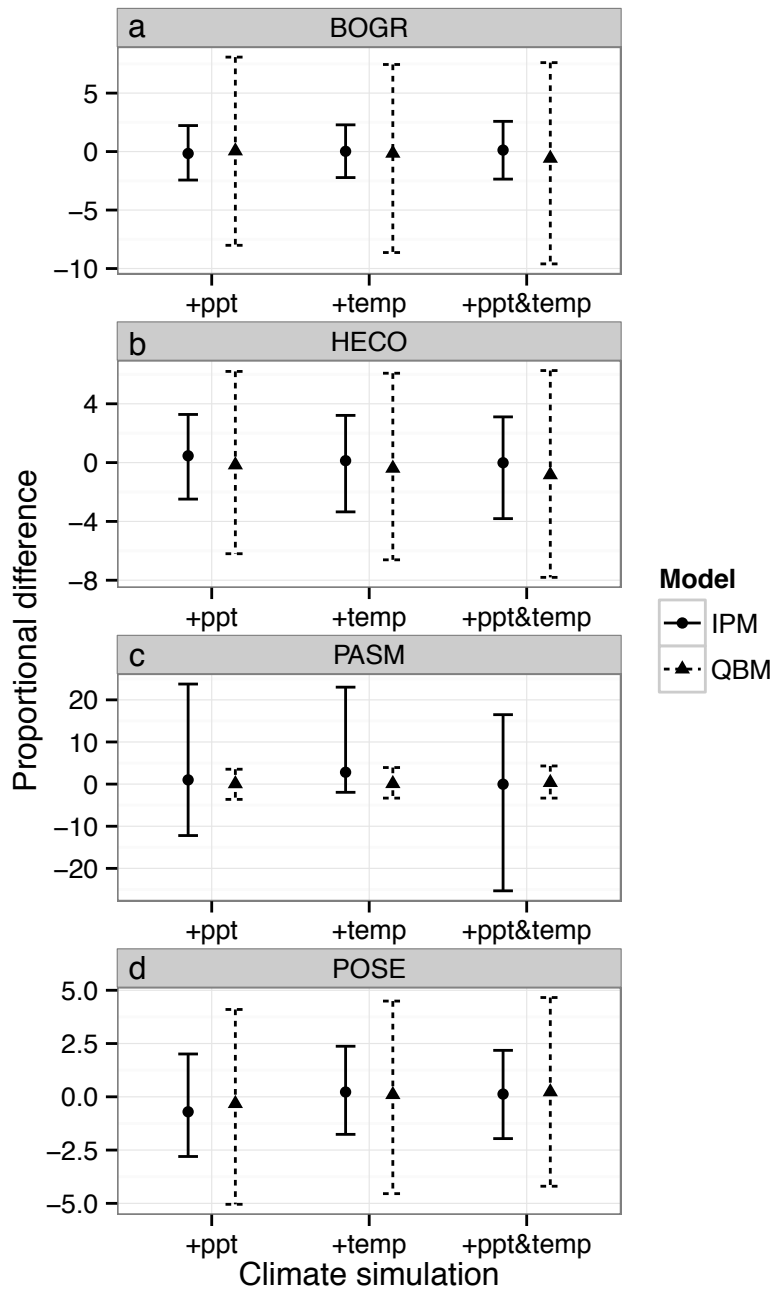

Figure 6: Mean (points) and 90% quantiles (errorbars) for the proportional difference between baseline simulations (using observed climate) and the climate perturbation simulation on the x-axis. We calculated proportional difference as  $\log(\text{perturbed climate cover}) - \log(\text{observed climate cover})$ , where ‘perturbed’ and ‘observed’ refer to the climate time series used to drive interannual variation in the simulations. Model error and parameter uncertainty were propagated through the simulation phase. Climate simulations are as in Figure 3.

## 500 **References**

- 501 Adler, P. B., H. J. Dalglish, and S. P. Ellner. 2012. Forecasting plant community impacts of  
502 climate variability and change: when do competitive interactions matter? *Journal of Ecology*  
503 100:478–487.
- 504 Adler, P. B., S. P. Ellner, and J. M. Levine. 2010. Coexistence of perennial plants: An  
505 embarrassment of niches.
- 506 Anderson, J., L. Vermeire, and P. B. Adler. 2011. Fourteen years of mapped, permanent  
507 quadrats in a northern mixed prairie, USA. *Ecology* 92:1703.
- 508 Araújo, M. B., and A. T. Peterson. 2012. Uses and misuses of bioclimatic envelope modeling.  
509 *Ecology* 93:1527–1539.
- 510 Battin, J., M. W. Wiley, M. H. Ruckelshaus, R. N. Palmer, E. Korb, K. K. Bartz, and H.  
511 Imaki. 2007. Projected impacts of climate change on salmon habitat restoration. *Proceedings*  
512 *of the National Academy of Sciences of the United States of America* 104:6720–6725.
- 513 Chu, C., and P. B. Adler. 2014. When should plant population models include age structure?  
514 *Journal of Ecology* 102:531–543.
- 515 Chu, C., and P. B. Adler. 2015. Large niche differences emerge at the recruitment stage to  
516 stabilize grassland coexistence. *Ecological Monographs*.
- 517 Chu, C., K. M. Havstad, N. Kaplan, W. K. Lauenroth, M. P. McClaran, D. P. Peters, L. T.  
518 Vermeire, and P. B. Adler. 2014. Life form influences survivorship patterns for 109 herbaceous  
519 perennials from six semi-arid ecosystems. *Journal of Vegetation Science* 25:947–954.
- 520 Clark, J. S., and O. N. Bjørnstad. 2004. Population time series: Process variability,  
521 observation errors, missing values, lags, and hidden states. *Ecology* 85:3140–3150.
- 522 Clark, J. S., D. M. Bell, M. H. Hersh, and L. Nichols. 2011a. Climate change vulnerability of  
523 forest biodiversity: Climate and competition tracking of demographic rates. *Global Change*  
524 *Biology* 17:1834–1849.

- 525 Clark, J. S., D. M. Bell, M. H. Hersh, M. C. Kwit, E. Moran, C. Salk, A. Stine, D. Valle,  
526 and K. Zhu. 2011b. Individual-scale variation, species-scale differences: Inference needed to  
527 understand diversity.
- 528 Clark, J. S., D. M. Bell, M. Kwit, A. Stine, B. Vierra, and K. Zhu. 2012. Individual-scale  
529 inference to anticipate climate-change vulnerability of biodiversity. *Philosophical Transactions*  
530 *of the Royal Society B: Biological Sciences* 367:236–246.
- 531 Clark, J. S., D. Bell, C. Chu, B. Courbaud, M. Dietze, M. Hersh, J. HilleRisLambers, I.  
532 Ibáñez, S. LaDeau, S. McMahon, J. Metcalf, J. Mohan, E. Moran, L. Pangle, S. Pearson,  
533 C. Salk, Z. Shen, D. Valle, and P. Wyckoff. 2010. High-dimensional coexistence based on  
534 individual variation: a synthesis of evidence. *Ecological Monographs* 80:569–608.
- 535 Clark, J. S., S. R. Carpenter, M. Barber, S. Collins, A. Dobson, J. A. Foley, D. M. Lodge, M.  
536 Pascual, R. Pielke, W. Pizer, C. Pringle, W. V. Reid, K. A. Rose, O. Sala, W. H. Schlesinger,  
537 D. H. Wall, and D. Wear. 2001. Ecological forecasts: an emerging imperative. *Science* (New  
538 York, N.Y.) 293:657–660.
- 539 Clark, J. S., A. E. Gelfand, C. W. Woodall, and K. Zhu. 2014. More than the sum of the  
540 parts: Forest climate response from joint species distribution models. *Ecological Applications*  
541 24:990–999.
- 542 Dalglish, H. J., D. N. Koons, M. B. Hooten, C. A. Moffet, and P. B. Adler. 2011. Climate  
543 influences the demography of three dominant sagebrush steppe plants. *Ecology* 92:75–85.
- 544 Doak, D. F., and W. F. Morris. 2010. Demographic compensation and tipping points in  
545 climate-induced range shifts. *Nature* 467:959–962.
- 546 Elith, J., and J. R. Leathwick. 2009. *Species Distribution Models: Ecological Explanation*  
547 *and Prediction Across Space and Time*.
- 548 Ellner, S. P., and M. Rees. 2006. Integral projection models for species with complex  
549 demography. *The American naturalist* 167:410–428.

- 550 Freckleton, R. P., W. J. Sutherland, A. R. Watkinson, and S. A. Queenborough. 2011.  
551 Density-structured models for plant population dynamics. *American Naturalist* 177:1–17.
- 552 Galván, J. D., J. J. Camarero, and E. Gutiérrez. 2014. Seeing the trees for the forest: Drivers  
553 of individual growth responses to climate in *Pinus uncinata* mountain forests. *Journal of*  
554 *Ecology* 102:1244–1257.
- 555 Guisan, A., and W. Thuiller. 2005. Predicting species distribution: Offering more than  
556 simple habitat models.
- 557 Hobbs, N. T., and M. B. Hooten. 2015. *Bayesian Models: A Statistical Primer for Ecologists*.  
558 Princeton University PressPrinceton.
- 559 Jenouvrier, S., H. Caswell, C. Barbraud, M. Holland, J. Stroeve, and H. Weimerskirch. 2009.  
560 Demographic models and IPCC climate projections predict the decline of an emperor penguin  
561 population. *Proceedings of the National Academy of Sciences of the United States of America*  
562 106:1844–1847.
- 563 Lauenroth, W. K., and P. B. Adler. 2008. Demography of perennial grassland plants: Survival,  
564 life expectancy and life span. *Journal of Ecology* 96:1023–1032.
- 565 Liu, Y., Y. Jang, W. Woo, and T.-K. Kim. 2014. Video-Based Object Recognition Using  
566 Novel Set-of-Sets Representations.
- 567 Luo, Y., K. Ogle, C. Tucker, S. Fei, C. Gao, S. LaDeau, J. S. Clark, and D. S. Schimel.  
568 2011. Ecological forecasting and data assimilation in a data-rich era. *Ecological Applications*  
569 21:1429–1442.
- 570 Maiorano, L., R. Cheddadi, N. E. Zimmermann, L. Pellissier, B. Petitpierre, J. Pottier, H.  
571 Laborde, B. I. Hurdu, P. B. Pearman, A. Psomas, J. S. Singarayer, O. Broennimann, P.  
572 Vittoz, A. Dubuis, M. E. Edwards, H. A. Binney, and A. Guisan. 2013. Building the niche  
573 through time: using 13,000 years of data to predict the effects of climate change on three  
574 tree species in Europe. *Global Ecology and Biogeography* 22:302–317.



- 575 Merow, C., A. M. Latimer, A. M. Wilson, S. M. McMahon, A. G. Rebelo, and J. A. Silander.  
576 2014. On using integral projection models to generate demographically driven predictions of  
577 species' distributions: development and validation using sparse data. *Ecography* 37:1167–1183.
- 578 Pearson, R. G., and T. P. Dawson. 2003. Predicting the impacts of climate change on  
579 the distribution of species: Are bioclimate envelope models useful? *Global Ecology and*  
580 *Biogeography* 12:361–371.
- 581 Perretti, C. T., S. B. Munch, and G. Sugihara. 2013. Model-free forecasting outperforms the  
582 correct mechanistic model for simulated and experimental data. *Proceedings of the National*  
583 *Academy of Sciences of the United States of America* 110:5253–5257.
- 584 Petchey, O. L., M. Pontarp, T. M. Massie, S. Kéfi, A. Ozgul, M. Weilenmann, G. M. Palamara,  
585 F. Altermatt, B. Matthews, J. M. Levine, D. Z. Childs, B. J. McGill, M. E. Schaepman, B.  
586 Schmid, P. Spaak, A. P. Beckerman, F. Pennekamp, and I. S. Pearse. 2015. The ecological  
587 forecast horizon, and examples of its uses and determinants. *Ecology Letters* 18:597–611.
- 588 Piantadosi, S., D. P. Byar, and S. B. Green. 1988. The Ecological Fallacy. *American Journal*  
589 *of Epidemiology* 127:893–904.
- 590 Queenborough, S. A., K. M. Burnet, W. J. Sutherland, A. R. Watkinson, and R. P. Freckleton.  
591 2011. From meso- to macroscale population dynamics: A new density-structured approach.  
592 *Methods in Ecology and Evolution* 2:289–302.
- 593 R Core Development Team. 2013. R: A language and environment for statistical computing.
- 594 Rees, M., and S. P. Ellner. 2009. Integral projection models for populations in temporally  
595 varying environments. *Ecological Monographs* 79:575–594.
- 596 Schurr, F. M., J. Pagel, J. S. Cabral, J. Groeneveld, O. Bykova, O'Hara R. B., F. Hartig, W. D.  
597 Kissling, H. P. Linder, G. F. Midgley, B. Schröder, A. Singer, and N. E. Zimmermann. 2012.  
598 How to understand species' niches and range dynamics: A demographic research agenda for  
599 biogeography. *Journal of Biogeography* 39:2146–2162.

600 Stan Development Team. 2014a. Stan: A C++ Library for Probability and Sampling, Version  
601 2.5.0.

602 Stan Development Team. 2014b. Rstan: the R interface to Stan, Version 2.5.0.

603 Sæther, B. E., S. Engen, V. Grøtan, W. Fiedler, E. Matthysen, M. E. Visser, J. Wright, A.  
604 P. Møller, F. Adriaensen, H. Van Balen, D. Balmer, M. C. Mainwaring, R. H. McCleery, M.  
605 Pampus, and W. Winkel. 2007. The extended Moran effect and large-scale synchronous  
606 fluctuations in the size of great tit and blue tit populations. *Journal of Animal Ecology*  
607 76:315–325.

608 Taylor, C. M., and A. Hastings. 2004. Finding optimal control strategies for invasive species: a  
609 density-structured model for *Spartina alterniflora*. *Journal of Applied Ecology* 41:1049–1057.

610 Teller, B. J., P. B. Adler, C. B. Edwards, G. Hooker, R. E. Snyder, and S. P. Ellner.  
611 (n.d.). Linking demography with drivers: climate and competition. *Methods in Ecology and*  
612 *Evolution*.
